# Supplementary material for: Assessing the durability and efficiency of landscape-based strategies to deploy plant resistance to pathogens
Source: PubMed Central journal article supplement (PMC5918245; doi:10.1371/journal.pcbi.1006067), 2018-04-12
Supplement: pcbi.1006067.s001.pdf [file pcbi.1006067.s001.pdf]

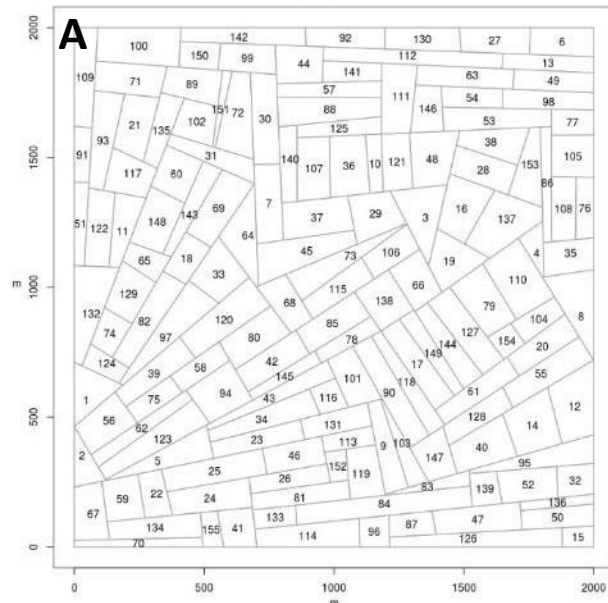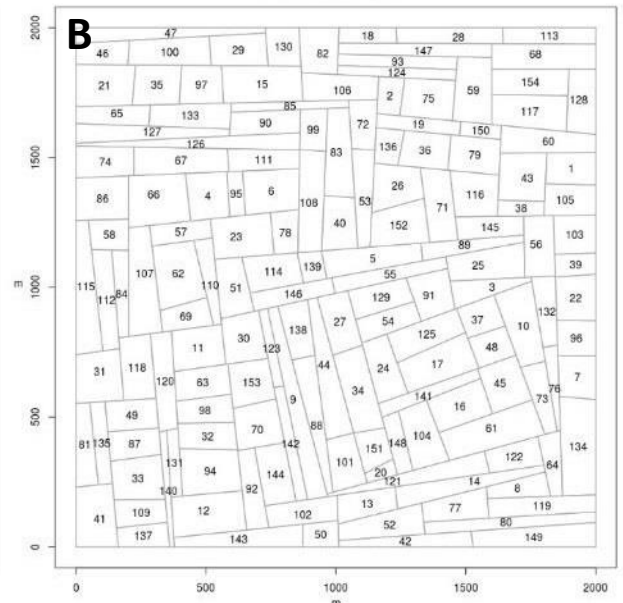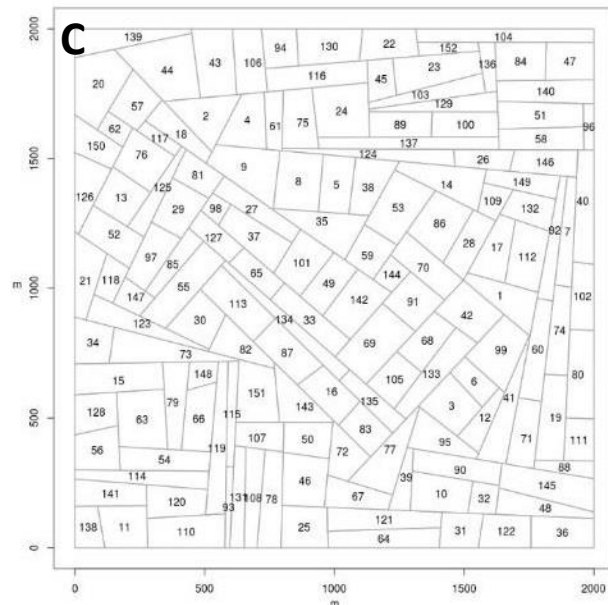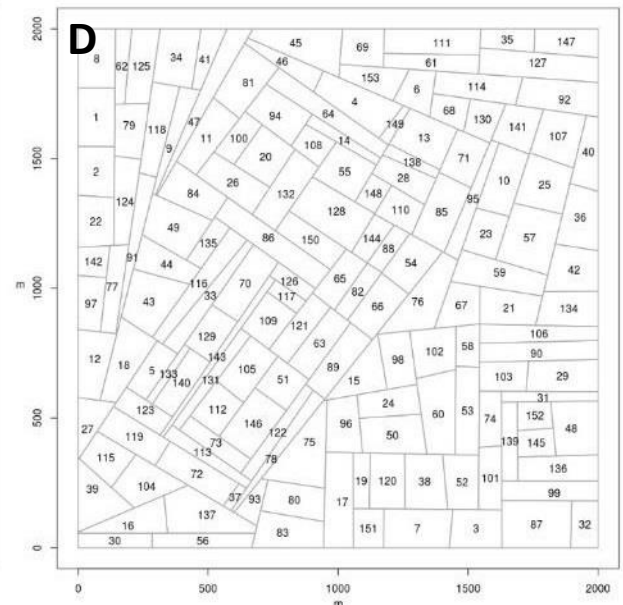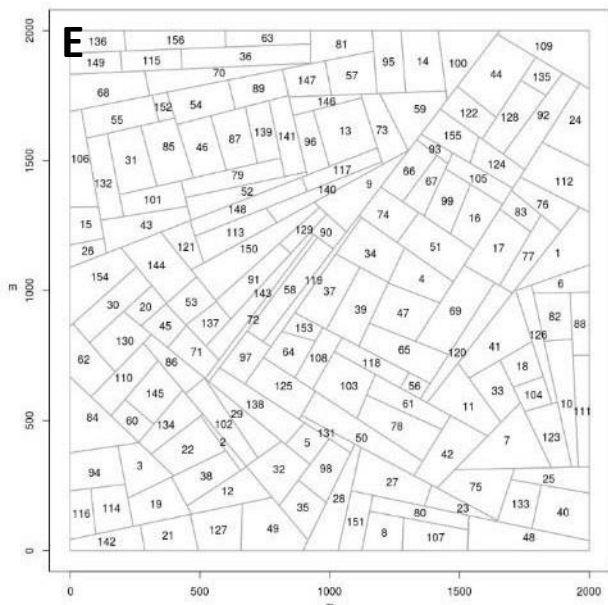

**S1 Figure. Landscape structures used in this study.** Landscapes of about 150 fields (total area: 2x2 km<sup>2</sup>) were simulated using a T-tessellation algorithm from package RLiTe (<http://kien-kieu.github.io/lite/rlite.html>), with controlled number, area and shape of the fields. Numbers correspond to field indices. The effect of landscape structure was never statistically significant in our simulations.
