# Supplementary material for: Assessing the durability and efficiency of landscape-based strategies to deploy plant resistance to pathogens
Source: PubMed Central journal article supplement (PMC5918245; doi:10.1371/journal.pcbi.1006067), 2018-04-12
Supplement: pcbi.1006067.s002.pdf [file pcbi.1006067.s002.pdf]

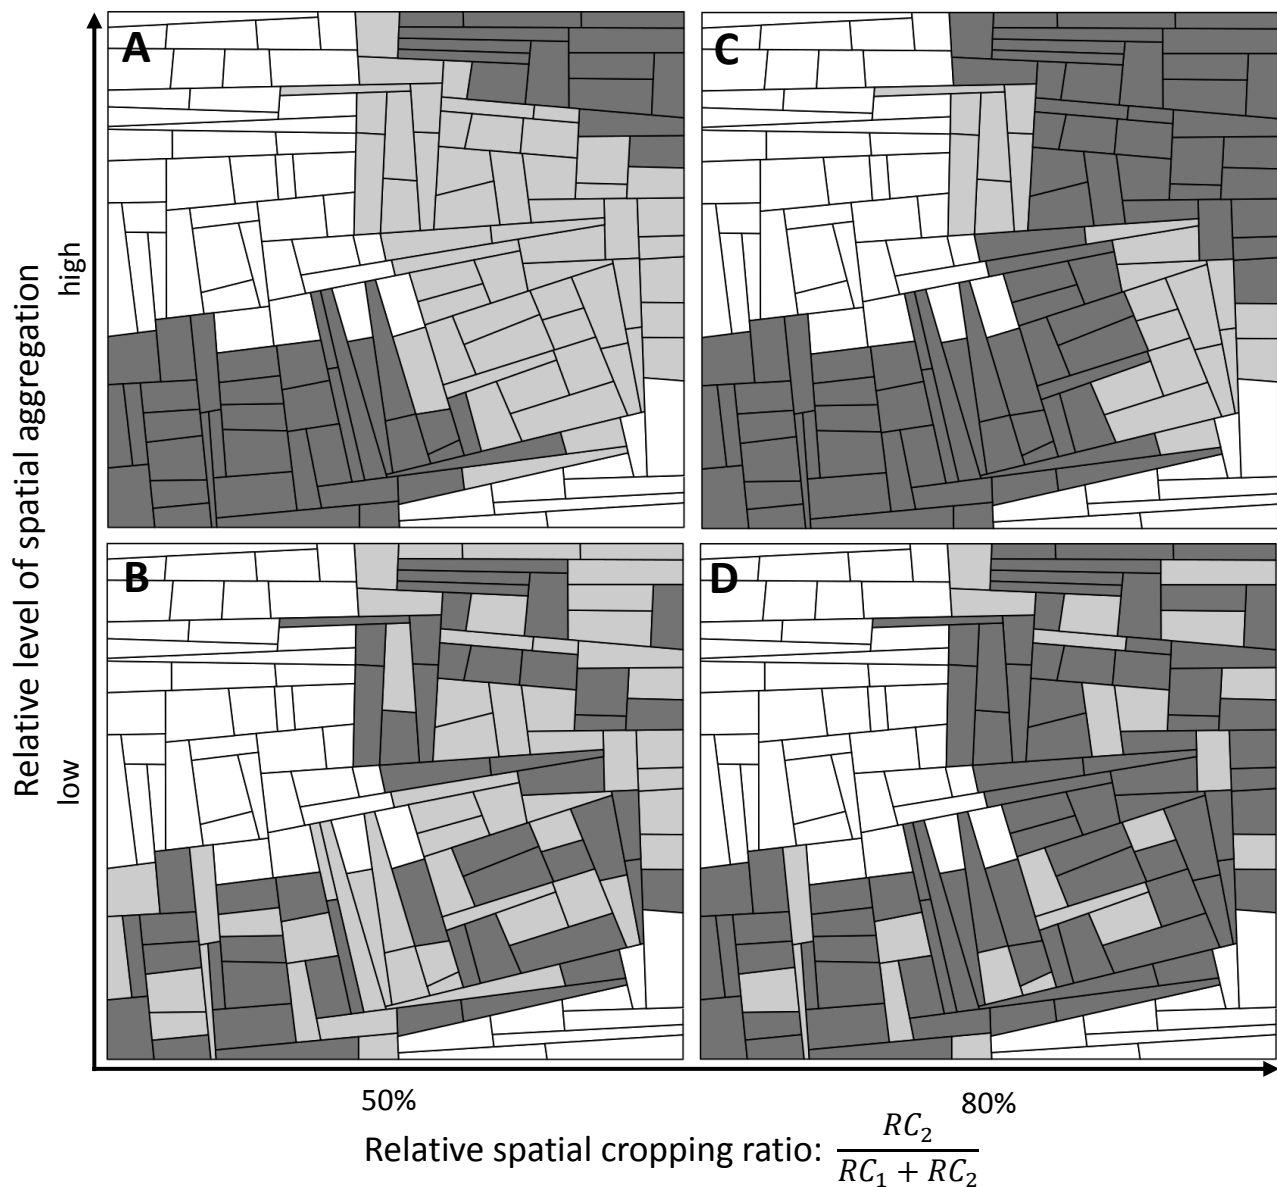

**S2 Figure. Spatial allocation of three cultivars across a cropping landscape.** A landscape structure is generated using T-tessellations. Then, a susceptible (white) and two resistant cultivars ( $RC_1$ , light grey, and  $RC_2$ , dark grey) are allocated to fields, with controlled relative proportions of the surface coverage (horizontal axis: 50% in A and B, 80% in C and D) and level of spatial aggregation (vertical axis: high in A and C, low in B and D) of  $RC_1$  and  $RC_2$ . The total proportion of resistant fields is  $\frac{2}{3}$  and their level of aggregation is high.
